# Supplementary material for: Occurrence of tet(O/M/O) Mosaic Gene in Tetracycline-Resistant Campylobacter
Source: PubMed Central journal article supplement (PMC7693602; doi:10.3390/microorganisms8111710), 2020-10-31
Supplement: microorganisms-08-01710-s001.pdf [file microorganisms-08-01710-s001.pdf]

Table S1 (supplementary). Tetracycline phenotype and genotype of *Campylobacter* isolates.

| Name <sup>1</sup> | Species          | CMI-Tet<br>(mg/L) | tet(O) |
|-------------------|------------------|-------------------|--------|
| HCC1              | <i>C. jejuni</i> | 32                | +      |
| HCC2              | <i>C. jejuni</i> | 128               | +      |
| HCC3              | <i>C. jejuni</i> | 128               | +      |
| HCC4              | <i>C. jejuni</i> | >512              | +      |
| HCC5              | <i>C. jejuni</i> | 256               | +      |
| HCC6              | <i>C. jejuni</i> | 128               | +      |
| HCC7              | <i>C. jejuni</i> | 128               | +      |
| HCC8              | <i>C. jejuni</i> | 64                | +      |
| HCC9              | <i>C. jejuni</i> | 64                | +      |
| HCC10             | <i>C. jejuni</i> | 2                 | -      |
| HCC11             | <i>C. jejuni</i> | 128               | +      |
| HCC13             | <i>C. jejuni</i> | 128               | +      |
| HCC14             | <i>C. jejuni</i> | 128               | +      |
| HCC15             | <i>C. jejuni</i> | 256               | +      |
| HCC16             | <i>C. jejuni</i> | 4                 | -      |
| HCC17             | <i>C. jejuni</i> | 128               | +      |
| HCC18             | <i>C. jejuni</i> | 4                 | -      |
| HCC19             | <i>C. jejuni</i> | 128               | +      |
| HCC20             | <i>C. jejuni</i> | >512              | +      |
| HCC21             | <i>C. jejuni</i> | 64                | +      |
| HCC22             | <i>C. jejuni</i> | 128               | +      |
| HCC23             | <i>C. jejuni</i> | >512              | +      |
| HCC24             | <i>C. jejuni</i> | 128               | +      |
| HCC25             | <i>C. jejuni</i> | 128               | +      |
| HCC26             | <i>C. jejuni</i> | 1                 | -      |
| HCC27             | <i>C. jejuni</i> | 2                 | -      |
| HCC28             | <i>C. jejuni</i> | 4                 | -      |
| HCC29             | <i>C. jejuni</i> | 256               | +      |
| HCC30             | <i>C. jejuni</i> | 256               | -      |
| HCC31             | <i>C. jejuni</i> | 4                 | -      |
| HCC32             | <i>C. jejuni</i> | 8                 | -      |
| HCC33             | <i>C. jejuni</i> | 64                | +      |
| HCC34             | <i>C. jejuni</i> | 4                 | -      |
| HCC35             | <i>C. jejuni</i> | 1                 | -      |
| HCC36             | <i>C. jejuni</i> | 4                 | -      |
| HCC37             | <i>C. jejuni</i> | 128               | +      |
| HCC38             | <i>C. jejuni</i> | 64                | +      |
| HCC40             | <i>C. jejuni</i> | 64                | +      |
| HCC41             | <i>C. jejuni</i> | 64                | +      |
| HCC43             | <i>C. coli</i>   | 512               | +      |

| Name <sup>1</sup> | Species          | CMI-Tet<br>(mg/L) | tetO |
|-------------------|------------------|-------------------|------|
| HCC44             | <i>C. jejuni</i> | 0.5               | -    |
| HCC45             | <i>C. jejuni</i> | 128               | +    |
| HCC46             | <i>C. jejuni</i> | 16                | +    |
| HCC47             | <i>C. jejuni</i> | 128               | +    |
| HCC48             | <i>C. jejuni</i> | 512               | +    |
| HCC49             | <i>C. jejuni</i> | 128               | +    |
| HCC50             | <i>C. jejuni</i> | 512               | +    |
| HCC51             | <i>C. jejuni</i> | >512              | +    |
| HCC52             | <i>C. jejuni</i> | 128               | +    |
| HCC54             | <i>C. jejuni</i> | 128               | +    |
| HCC55             | <i>C. jejuni</i> | 512               | +    |
| HCC56             | <i>C. jejuni</i> | >512              | +    |
| HCC57             | <i>C. jejuni</i> | 2                 | -    |
| HCC58             | <i>C. jejuni</i> | 128               | +    |
| HCC59             | <i>C. jejuni</i> | 512               | +    |
| HCC60             | <i>C. jejuni</i> | 512               | +    |
| HCC61             | <i>C. jejuni</i> | 16                | +    |
| HCC62             | <i>C. jejuni</i> | 4                 | -    |
| HCC63             | <i>C. jejuni</i> | 512               | +    |
| HCC64             | <i>C. jejuni</i> | 128               | +    |
| HCC65             | <i>C. jejuni</i> | 256               | +    |
| HCC66             | <i>C. jejuni</i> | 32                | +    |
| HCC67             | <i>C. jejuni</i> | 256               | +    |
| HCC68             | <i>C. jejuni</i> | 128               | +    |
| HCC69             | <i>C. jejuni</i> | 4                 | -    |
| HCC70             | <i>C. jejuni</i> | 64                | +    |
| HCC71             | <i>C. jejuni</i> | 64                | +    |
| HCC72             | <i>C. jejuni</i> | 128               | +    |
| HCC73             | <i>C. jejuni</i> | 64                | +    |
| HCC74             | <i>C. jejuni</i> | 64                | +    |
| HCC75             | <i>C. jejuni</i> | 128               | +    |
| HCC76             | <i>C. jejuni</i> | 128               | +    |
| HCC77             | <i>C. jejuni</i> | 512               | +    |
| HCC81             | <i>C. jejuni</i> | 128               | +    |
| HCC82             | <i>C. jejuni</i> | 128               | +    |
| HCC83             | <i>C. jejuni</i> | 128               | +    |
| HCC86             | <i>C. jejuni</i> | 128               | +    |
| HCC87             | <i>C. jejuni</i> | 2                 | -    |
| HCC88             | <i>C. jejuni</i> | 64                | +    |
| HCC89             | <i>C. jejuni</i> | 64                | +    |
| HCC90             | <i>C. jejuni</i> | 128               | +    |

| <b>Name<sup>1</sup></b> | <b>Species</b>   | <b>CMI-Tet<br/>(mg/L)</b> | <b>tetO</b> |
|-------------------------|------------------|---------------------------|-------------|
| HCC91                   | <i>C. jejuni</i> | 64                        | +           |
| HCC92                   | <i>C. jejuni</i> | 64                        | +           |
| HCC95                   | <i>C. jejuni</i> | 64                        | +           |
| HSA 1                   | <i>C. jejuni</i> | 64                        | +           |
| HSA 2                   | <i>C. jejuni</i> | 128                       | +           |
| HSA4                    | <i>C. jejuni</i> | 64                        | +           |
| HSA5                    | <i>C. jejuni</i> | 256                       | +           |
| HSA6                    | <i>C. jejuni</i> | 64                        | +           |
| HSA7                    | <i>C. jejuni</i> | 4                         | -           |
| HSA8                    | <i>C. jejuni</i> | 64                        | +           |
| HSA9                    | <i>C. jejuni</i> | 64                        | +           |
| HSA10                   | <i>C. jejuni</i> | 128                       | +           |
| HSA11                   | <i>C. jejuni</i> | 128                       | +           |
| HSA12                   | <i>C. jejuni</i> | 1                         | -           |
| HSA13                   | <i>C. jejuni</i> | 128                       | +           |
| HSA14                   | <i>C. jejuni</i> | 4                         | -           |
| HSA15                   | <i>C. jejuni</i> | 1                         | -           |
| HSA16                   | <i>C. coli</i>   | 32                        | +           |
| HSA17                   | <i>C. jejuni</i> | 32                        | +           |
| HSA18                   | <i>C. jejuni</i> | 1                         | -           |
| HSA19                   | <i>C. jejuni</i> | 1                         | -           |
| HSA20                   | <i>C. coli</i>   | 64                        | +           |
| HSA21                   | <i>C. jejuni</i> | 128                       | +           |
| HSA22                   | <i>C. jejuni</i> | 128                       | +           |
| HSA23                   | <i>C. jejuni</i> | 256                       | +           |
| HSA24                   | <i>C. jejuni</i> | 128                       | +           |
| HSA25                   | <i>C. jejuni</i> | 64                        | +           |
| HSA26                   | <i>C. jejuni</i> | 64                        | +           |
| HSA27                   | <i>C. jejuni</i> | 128                       | +           |
| HSA28                   | <i>C. coli</i>   | 256                       | +           |
| HSA29                   | <i>C. jejuni</i> | 128                       | +           |
| HSA30                   | <i>C. jejuni</i> | 128                       | +           |
| HSA31                   | <i>C. jejuni</i> | 1                         | -           |
| HSA32                   | <i>C. jejuni</i> | 128                       | +           |
| HSA33                   | <i>C. jejuni</i> | 64                        | +           |
| HSA35                   | <i>C. jejuni</i> | 128                       | +           |
| HSA36                   | <i>C. jejuni</i> | 64                        | +           |
| HSA37                   | <i>C. jejuni</i> | 128                       | +           |
| HSA38                   | <i>C. jejuni</i> | >512                      | +           |
| HSA39                   | <i>C. jejuni</i> | 16                        | +           |
| HSA40                   | <i>C. jejuni</i> | 128                       | +           |

| <b>Name<sup>1</sup></b> | <b>Species</b>   | <b>CMI-Tet<br/>(mg/L)</b> | <b>tetO</b> |
|-------------------------|------------------|---------------------------|-------------|
| <b>HSA41</b>            | <i>C. jejuni</i> | 4                         | -           |
| <b>HSA42</b>            | <i>C. jejuni</i> | 128                       | +           |
| <b>HSA43</b>            | <i>C. jejuni</i> | 128                       | +           |
| <b>HSA44</b>            | <i>C. jejuni</i> | 64                        | +           |
| <b>HSA45</b>            | <i>C. jejuni</i> | 128                       | +           |
| <b>HSA46</b>            | <i>C. coli</i>   | 256                       | +           |
| <b>HSA47</b>            | <i>C. jejuni</i> | 4                         | -           |
| <b>HSA48</b>            | <i>C. jejuni</i> | 128                       | +           |
| <b>HNA1</b>             | <i>C. coli</i>   | 1                         | -           |
| <b>HNA2</b>             | <i>C. jejuni</i> | 4                         | -           |
| <b>HNA3</b>             | <i>C. jejuni</i> | 128                       | +           |
| <b>HNA4</b>             | <i>C. coli</i>   | 256                       | +           |
| <b>HNA5</b>             | <i>C. jejuni</i> | 2                         | -           |
| <b>HNA6</b>             | <i>C. jejuni</i> | 512                       | +           |
| <b>HNA7</b>             | <i>C. jejuni</i> | 8                         | -           |
| <b>HNA8</b>             | <i>C. jejuni</i> | 128                       | +           |
| <b>HNA9</b>             | <i>C. jejuni</i> | 512                       | +           |

<sup>1</sup>Strains analyzed in this work have been previously and partially characterized (Hormeño et al., 2016; Hormeño et al., 2018; Mourkas et al., 2019).
